# Supplementary material for: Minimizing CO2 emissions with renewable energy: a comparative study of emerging technologies in the steel industry
Source: Royal Society of Chemistry journal article supplement (doi:10.1039/d0ee00787k), 2020-01-01
Supplement: d0ee00787k1.pdf [file d0ee00787k1.pdf]

## Electronic Supplementary Information:

### Minimizing CO<sub>2</sub> emissions with renewable energy: A comparative study of emerging technologies in the steel industry

Marian Flores-Granobles and Mark Saeys

#### S1 Process diagrams of the scenarios

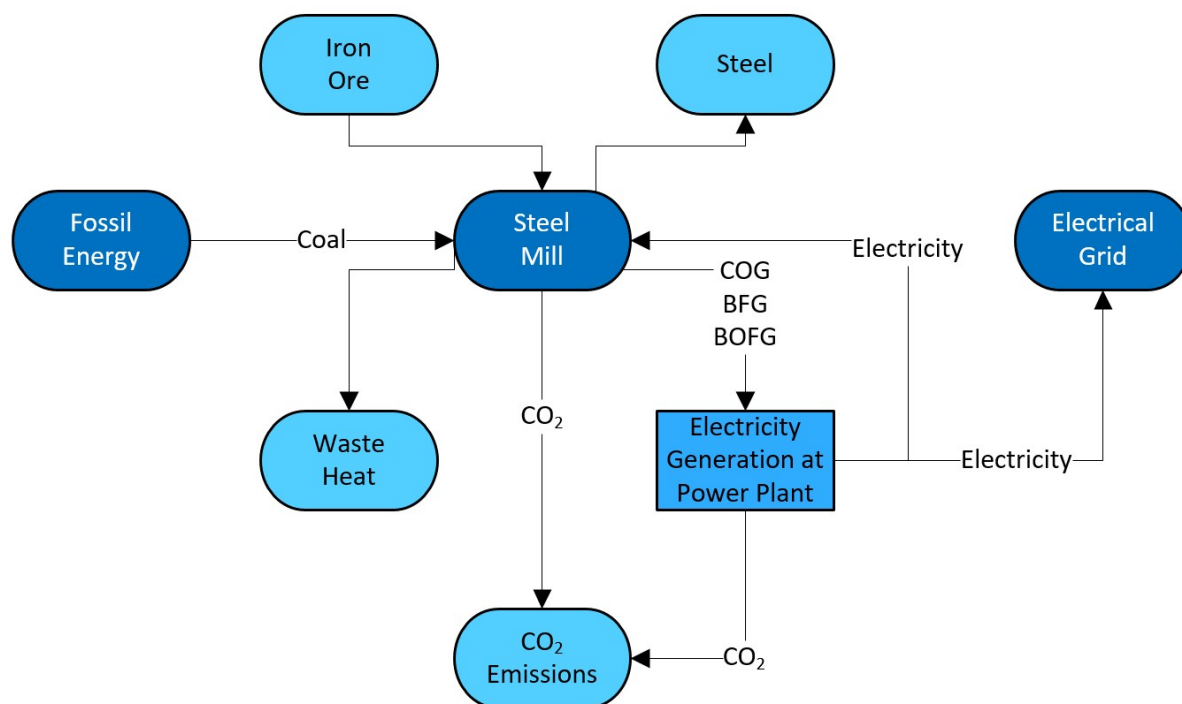

Figure S1. Carbon-based steel mill with power plant. (Scenario 1-CST)

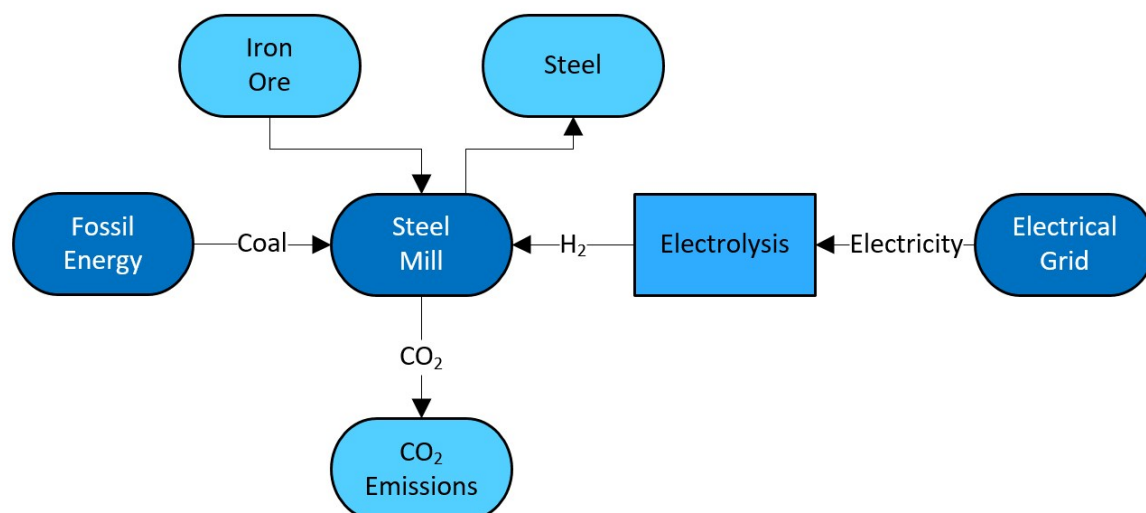

Figure S2. Hydrogen-based steel mill. (Scenario 2-HST)

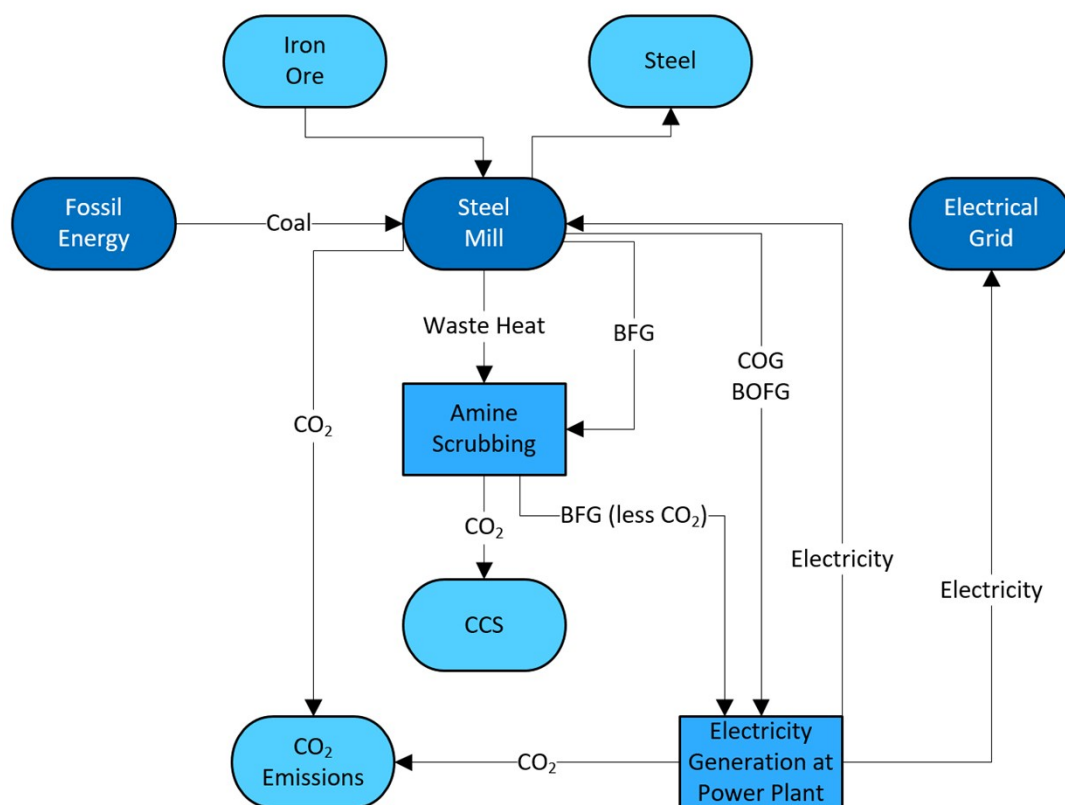

**Figure S3.** Carbon-based steel mill with power plant and pre-combustion CO<sub>2</sub> capture using the plant's waste heat. (Scenario 3-CST-WHC)

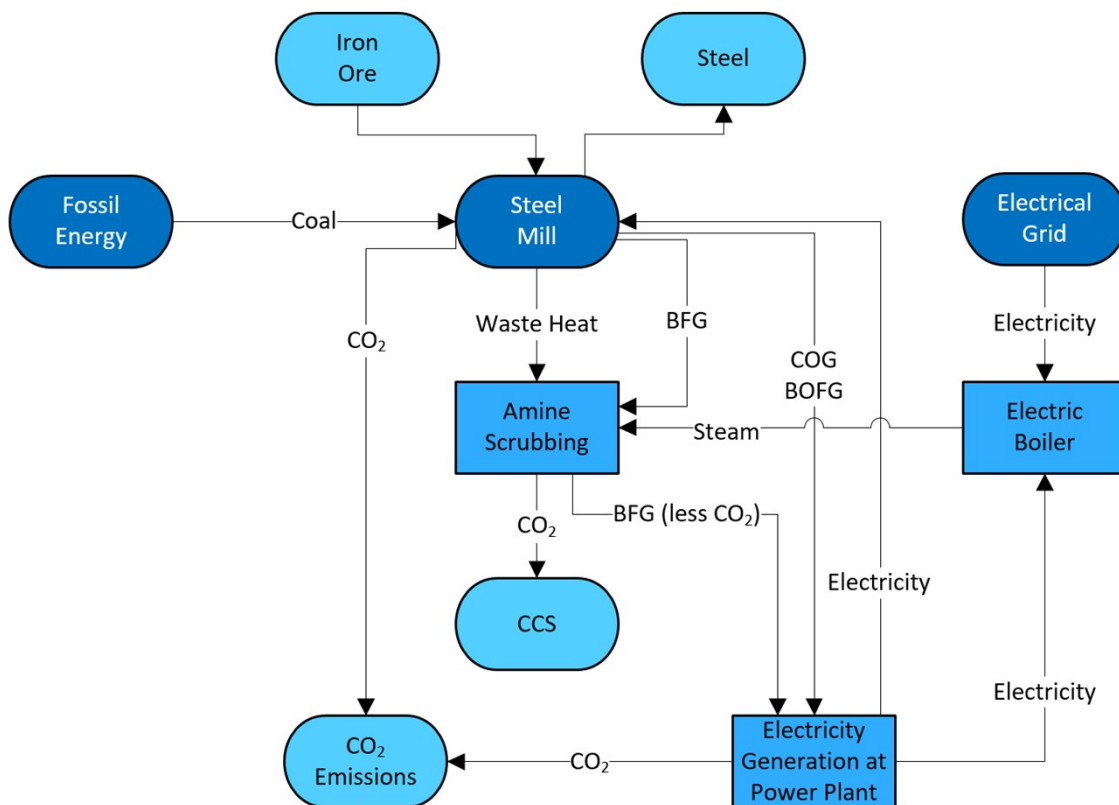

**Figure S4.** Carbon-based steel mill with power plant and pre-combustion CO<sub>2</sub> capture using the plant's waste heat and steam from an electric boiler. (Scenario 4-CST-EBC)

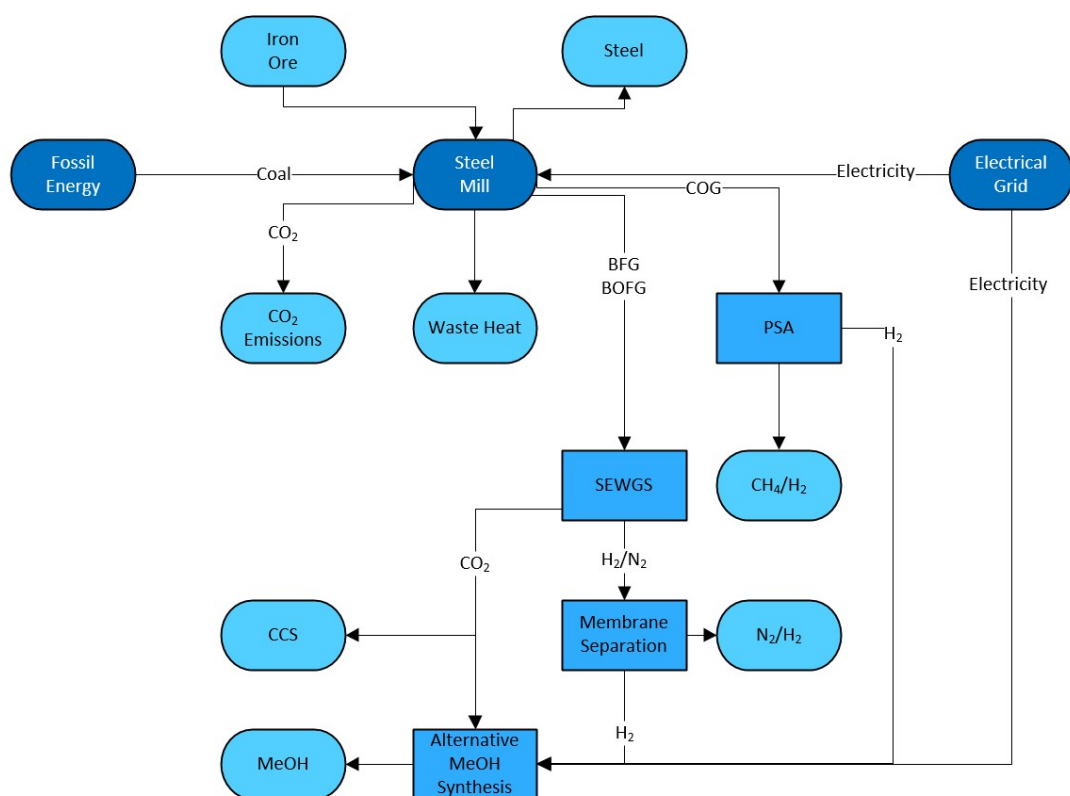

**Figure S5.** Carbon-based steel mill with treatment of the gases originally sent to the power plant, CO<sub>2</sub> storage and methanol production. (Scenario 5-CST-GPP-CCUS)

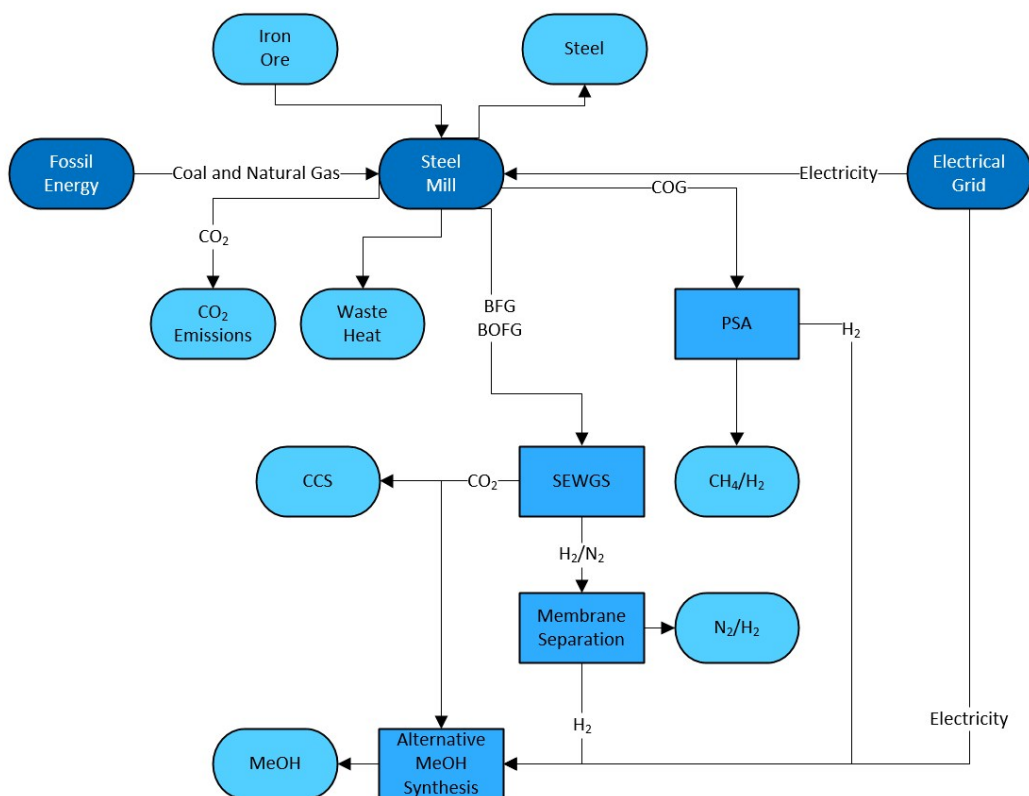

**Figure S6.** Carbon-based steel mill with treatment of the gases originally sent to the power plant and burned for heating on site, CO<sub>2</sub> storage and methanol production. (Scenario 6-CST-GPH-CCUS)

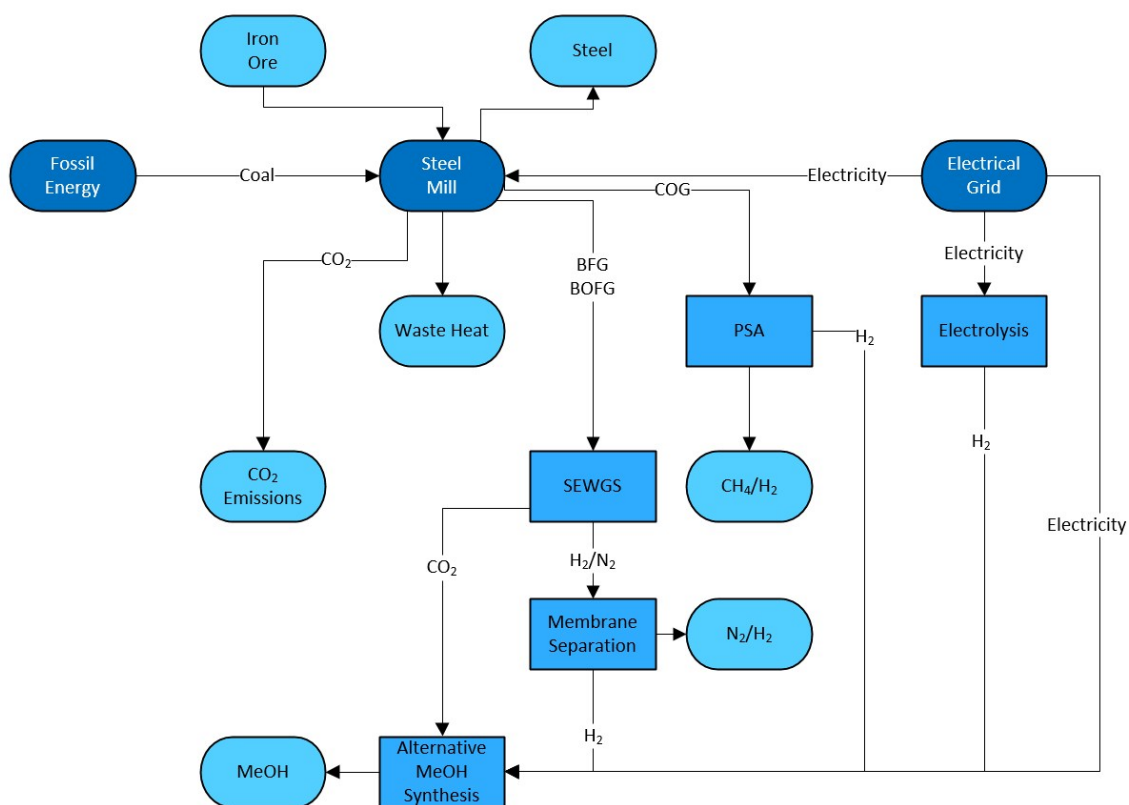

**Figure S7.** Carbon-based steel mill with treatment of the gases originally sent to the power plant, H<sub>2</sub> production by electrolysis and methanol production. (Scenario 7-CST-GPP-CCU)

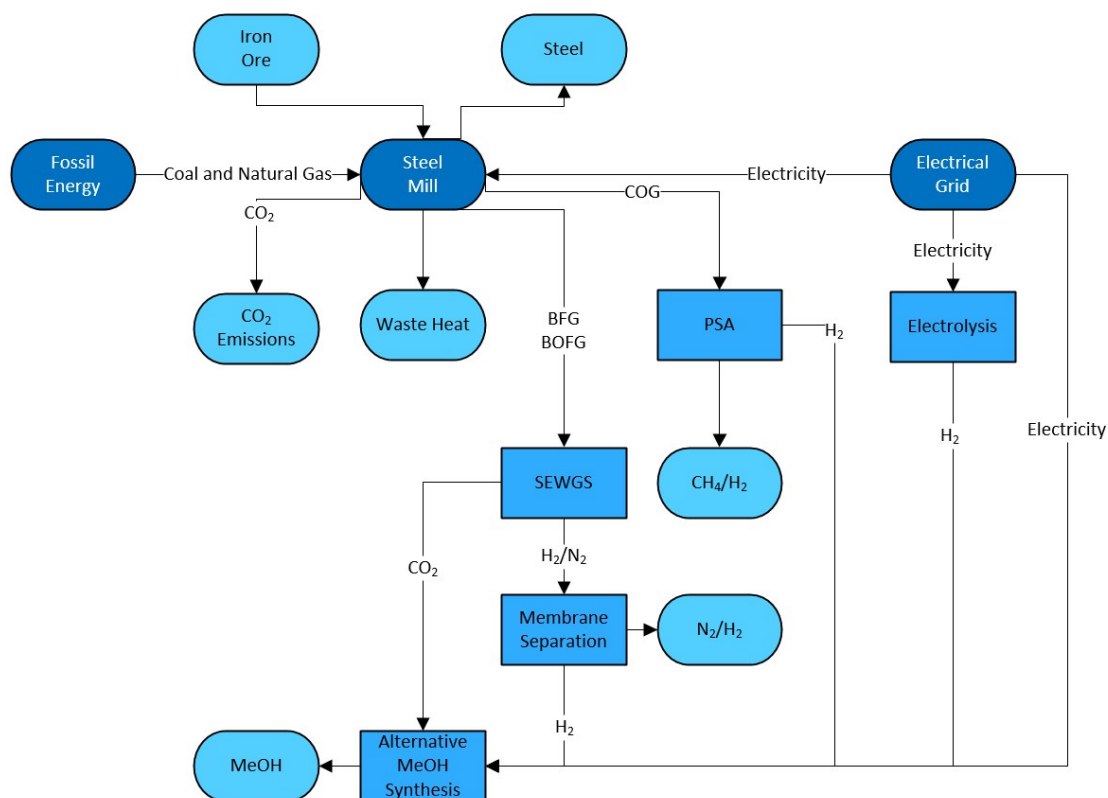

**Figure S8.** Carbon-based steel mill with treatment of the gases originally sent to the power plant and burned for heating on site, H<sub>2</sub> production by electrolysis and methanol production. (Scenario 8-CST-GPH-CCU)

### S2 Effect of the Grid Emission Intensity (GEI) on the CO<sub>2</sub> emissions for the different scenarios

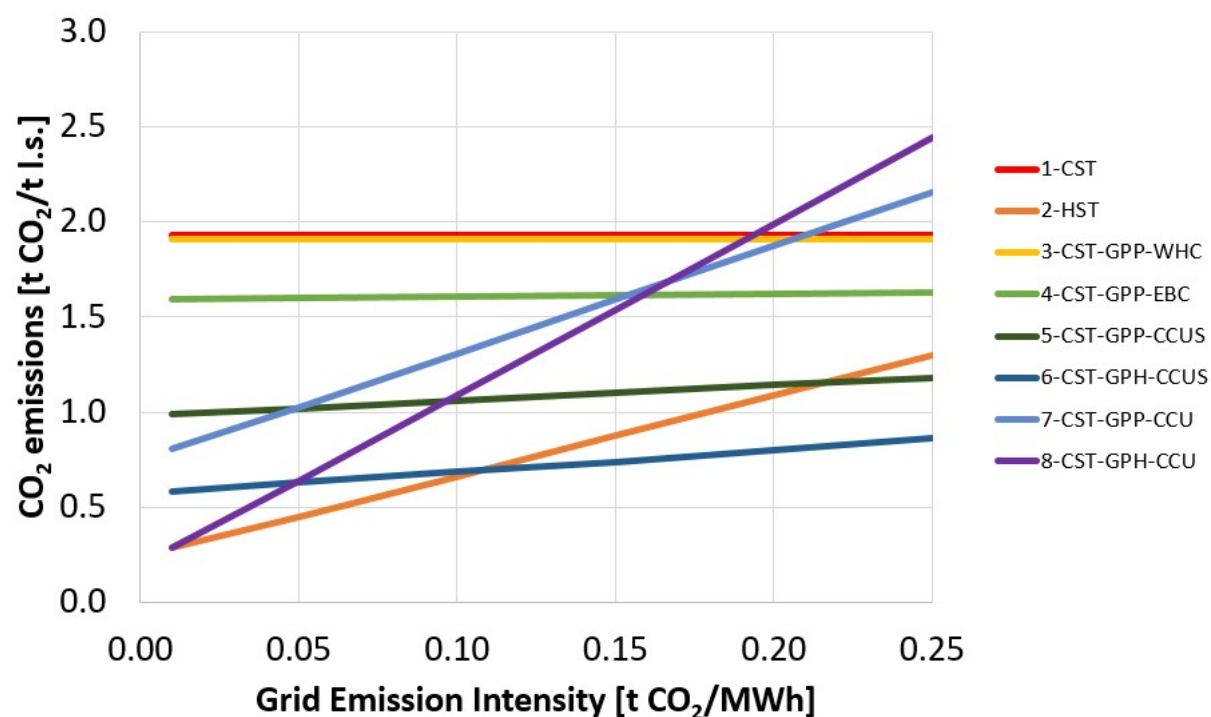

Figure S9. Sensitivity of the CO<sub>2</sub> emissions for the different scenarios on the Grid Emission Intensity (GEI).

### S3 CO<sub>2</sub> stored and methanol produced in the scenarios

Table S1. CO<sub>2</sub> stored and methanol produced in the scenarios

| Scenario          | CO <sub>2</sub> Stored<br>[t CO <sub>2</sub> /t l.s.] | Methanol Produced<br>[t methanol/t l.s.] |
|-------------------|-------------------------------------------------------|------------------------------------------|
| 2<br>HST          | 0                                                     | 0                                        |
| 3<br>CST-WHC      | 0.02                                                  | 0                                        |
| 4<br>CST-EBC      | 0.34                                                  | 0                                        |
| 5<br>CST-GPP-CCUS | 0.63                                                  | 0.14                                     |
| 6<br>CST-GPH-CCUS | 1.0                                                   | 0.22                                     |
| 7<br>CST-GPP-CCU  | 0                                                     | 0.59                                     |
| 8<br>CST-GPH-CCU  | 0                                                     | 0.96                                     |

## S4 Data for the scenarios

**Table S2.** Data for the conventional steel plant

| Description                                                                   | Value  | Units                     | Source                                                                                                                                                                                                             |
|-------------------------------------------------------------------------------|--------|---------------------------|--------------------------------------------------------------------------------------------------------------------------------------------------------------------------------------------------------------------|
| Feedstock for the steel plant                                                 | 14     | GJ/t l.s.                 | Gross and net fuel input for the hot metal production of a conventional steel plant <sup>1</sup> .                                                                                                                 |
| Feedstock for heating in the steel plant                                      | 3.2    | GJ/t l.s.                 | Own calculation based on the replacement of the steel mill gases with natural gas <sup>1</sup>                                                                                                                     |
| Waste heat from the steel plant available for amine scrubbing                 | -0.047 | GJ/t l.s.                 | Waste heat over 150 °C <sup>2, 3</sup>                                                                                                                                                                             |
| Electricity required at the steel plant                                       | 0.23   | MWh/t l.s.                | Electricity consumption of a conventional steel plant <sup>1</sup> .                                                                                                                                               |
| Electricity generated in the power plant                                      | -0.45  | MWh/t l.s.                | Own calculation based on the composition of the gases sent to the power plant and a 32.1% of thermal efficiency <sup>1</sup> .                                                                                     |
| CO <sub>2</sub> emissions from the steel plant (not-related to electricity)   | 1.0    | t CO <sub>2</sub> /t l.s. | Includes the CO <sub>2</sub> emissions from the pellet plant <sup>4</sup> , sinter plant, lime plant, the combustion of part of the steel mill gases to generate heat in the plant and flared gases <sup>1</sup> . |
| CO <sub>2</sub> emissions from the use of natural gas as heating in the plant | 0.18   | t CO <sub>2</sub> /t l.s. | Own calculation based on the composition of the natural gas pipeline available in the steel plant <sup>1</sup> .                                                                                                   |
| CO <sub>2</sub> emissions from the power plant                                | 0.93   | t CO <sub>2</sub> /t l.s. | Own calculations based on the composition of the gases sent to the power plant in a conventional steel plant <sup>1</sup> .                                                                                        |

**Table S3.** Data for the capture of CO<sub>2</sub> from the pre-combustion BFG.

| Description                                   | Value | Units                 | Source                                                                                                                                                         |
|-----------------------------------------------|-------|-----------------------|----------------------------------------------------------------------------------------------------------------------------------------------------------------|
| Electricity for the amine scrubber            | 0.22  | MWh/t CO <sub>2</sub> | Modelled values in Aspen Plus based on the compression of BFG to 6 bar <sup>3</sup> and the compression of CO <sub>2</sub> to 110 bar <sup>1</sup> .           |
| Electricity required for the electric boilers | 0.29  | MWh/t l.s.            | Own calculation based on 2.4 GJ/t CO <sub>2</sub> captured are required at 150 °C <sup>3</sup> and an efficiency of 97% of the electric boilers <sup>5</sup> . |

**Table S4.** Collected data for the H<sub>2</sub>-based steel plant

| Description                                                                   | Value  | Units                     | Source                                                                                                                                                                                                  |
|-------------------------------------------------------------------------------|--------|---------------------------|---------------------------------------------------------------------------------------------------------------------------------------------------------------------------------------------------------|
| Coal in the EAF                                                               | 0.85   | GJ/t l.s.                 | Input of 27 kg of coal in the EAF (31.1 MJ/kg coal <sup>1</sup> ), considering that half of the carbon stays in the steel and the other half is emitted as 50 kg CO <sub>2</sub> /t l.s. <sup>6</sup> . |
| Electricity required at the direct reduction plant and EAF                    | 0.63   | MWh/t l.s.                | Based on literature <sup>7</sup> .                                                                                                                                                                      |
| Electricity required for the production of H <sub>2</sub> .                   | 3.6    | MWh/t l.s.                | Own calculation based on 94% of metallization <sup>7</sup> (1.06 t DRI/t l.s.), 8.2 GJ/t DRI of hydrogen <sup>6, 8</sup> and 4.5 kWh/Nm <sup>3</sup> H <sub>2</sub> <sup>9</sup> .                      |
| CO <sub>2</sub> emissions from pellet production                              | 0.12   | t CO <sub>2</sub> /t l.s. | Based on literature <sup>4</sup>                                                                                                                                                                        |
| CO <sub>2</sub> emissions from carbon addition to the EAF                     | 0.050  | t CO <sub>2</sub> /t l.s. | Based on literature <sup>6</sup>                                                                                                                                                                        |
| CO <sub>2</sub> emissions from lime production                                | 0.056  | t CO <sub>2</sub> /t l.s. | Based on literature <sup>1</sup>                                                                                                                                                                        |
| CO <sub>2</sub> emissions from the decomposition of the electrodes in the EAF | 0.0070 | t CO <sub>2</sub> /t l.s. | Based on literature <sup>10</sup>                                                                                                                                                                       |

**Table S5.** Data for conventional methanol production

| Description                                                                        | Value | Units                         | Source                             |
|------------------------------------------------------------------------------------|-------|-------------------------------|------------------------------------|
| Feedstock for the fossil methanol production                                       | 25    | GJ/t methanol                 | Natural gas <sup>5</sup> .         |
| Fuel for the fossil methanol production                                            | 14    | GJ/t methanol                 | Natural gas <sup>5</sup> .         |
| Steam exported from the methanol production                                        | -2.0  | GJ/t methanol                 | Based on literature <sup>5</sup> . |
| Direct CO <sub>2</sub> emissions from the steel plant (not-related to electricity) | 0.52  | t CO <sub>2</sub> /t methanol | Based on literature <sup>5</sup> . |

**Table S6.** Data for alternative methanol production

| Description                                                                                             | Value                    | Units                              | Source                                                                                                                                                                                                                                                                                                             |
|---------------------------------------------------------------------------------------------------------|--------------------------|------------------------------------|--------------------------------------------------------------------------------------------------------------------------------------------------------------------------------------------------------------------------------------------------------------------------------------------------------------------|
| Electricity for alternative methanol synthesis                                                          | 1.5                      | MWh/t methanol                     | Based on literature <sup>5</sup> .                                                                                                                                                                                                                                                                                 |
| Electricity for the PSA unit                                                                            | GPP: 0.015<br>GPH: 0.027 | MWh/t l.s.                         | Process modelling based on the composition of the COG <sup>1</sup> and a recent patent for the recovery of 90% of the H <sub>2</sub> <sup>11</sup> .                                                                                                                                                               |
| Electricity for the SEWGS process                                                                       | GPP: 0.29<br>GPH: 0.46   | MWh/t l.s.                         | Process modelling based on the composition of the BFG and BOFG <sup>1</sup> , gas compression to 26 bar <sup>12</sup> , the compression of the H <sub>2</sub> -rich gas for the 2-stages membrane separation <sup>13</sup> and the electrical requirement of the steam boilers with 97% of efficiency <sup>5</sup> |
| CO <sub>2</sub> emissions from the combustion of the N <sub>2</sub> -rich gas after membrane separation | GPP: 0.048<br>GPH: 0.077 | t CO <sub>2</sub> /t l.s.          | Process modelling based on the composition of BFG and BOFG <sup>1</sup> and the 2-stages membrane separation <sup>13</sup>                                                                                                                                                                                         |
| Electricity for the production of H <sub>2</sub>                                                        | 4.5                      | kWh/Nm <sup>3</sup> H <sub>2</sub> | Based on literature <sup>9</sup> .                                                                                                                                                                                                                                                                                 |

**Table S7.** Electricity requirements

| Scenario          | Steel Mill<br>[MWh/t l.s.] | Carbon Storage<br>[MWh/t l.s.] | Alternative<br>Methanol Plant<br>[MWh/t l.s.] | Electrolyzer<br>[MWh/t l.s.] | Total<br>[MWh/t l.s.] |
|-------------------|----------------------------|--------------------------------|-----------------------------------------------|------------------------------|-----------------------|
| 1<br>CST          | -0.22                      | -                              | -                                             | -                            | -0.22                 |
| 2<br>HST          | 4.2                        | -                              | -                                             | -                            | 4.2                   |
| 3<br>CST-WHC      | -0.22                      | 0.0043                         | -                                             | -                            | -0.22                 |
| 4<br>CST-EBC      | -0.22                      | 0.36                           | -                                             | -                            | 0.14                  |
| 5<br>CST-GPP-CCUS | 0.20                       | 0.078                          | 0.51                                          | -                            | 0.79                  |
| 6<br>CST-GPH-CCUS | 0.19                       | 0.13                           | 0.82                                          | -                            | 1.1                   |
| 7<br>CST-GPP-CCU  | 0.13                       | -                              | 1.2                                           | 4.2                          | 5.6                   |
| 8                 | 0.064                      | -                              | 1.9                                           | 6.9                          | 8.9                   |

S5 CO<sub>2</sub> emissions in the scenarios**Table S8.** CO<sub>2</sub> emissions in the scenarios with a GEI<sub>1</sub> = 0.25 t CO<sub>2</sub>/MWh

| Scenario          | Steel Mill<br>[t CO <sub>2</sub> /t I.s.] | CO <sub>2</sub> capture and<br>storage [t CO <sub>2</sub> /t I.s.] | Alternative Methanol<br>Plant [t CO <sub>2</sub> /t I.s.] | Electrolyzer<br>[t CO <sub>2</sub> /t I.s.] | Total<br>[t CO <sub>2</sub> /t I.s.] |
|-------------------|-------------------------------------------|--------------------------------------------------------------------|-----------------------------------------------------------|---------------------------------------------|--------------------------------------|
| 1<br>CST          | 1.9                                       | -                                                                  | -                                                         | -                                           | 1.9                                  |
| 2<br>HST          | 0.4                                       | -                                                                  | -                                                         | 0.9                                         | 1.3                                  |
| 3<br>CST-WHC      | 1.9                                       | 0.0011                                                             | -                                                         | -                                           | 1.9                                  |
| 4<br>CST-EBC      | 1.6                                       | 0.036                                                              | -                                                         | -                                           | 1.6                                  |
| 5<br>CST-GPP-CCUS | 0.99                                      | 0.020                                                              | 0.17                                                      | -                                           | 1.2                                  |
| 6<br>CST-GPH-CCUS | 0.55                                      | 0.03                                                               | 0.28                                                      | -                                           | 0.86                                 |
| 7<br>CST-GPP-CCU  | 0.75                                      | -                                                                  | 0.35                                                      | 1.1                                         | 2.2                                  |
| 8<br>CST-GPH-CCU  | 0.17                                      | -                                                                  | 0.56                                                      | 1.7                                         | 2.4                                  |

**Table S9.** CO<sub>2</sub> emissions in the scenarios with a GEI<sub>2</sub> = 0.01 t CO<sub>2</sub>/t MWh

| Scenario          | Steel Mill<br>[t CO <sub>2</sub> /t I.s.] | CO <sub>2</sub> capture and storage<br>[t CO <sub>2</sub> /t I.s.] | Alternative Methanol<br>Plant [t CO <sub>2</sub> /t I.s.] | Electrolyzer<br>[t CO <sub>2</sub> /t I.s.] | Total<br>[t CO <sub>2</sub> /t I.s.] |
|-------------------|-------------------------------------------|--------------------------------------------------------------------|-----------------------------------------------------------|---------------------------------------------|--------------------------------------|
| 1<br>CST          | 1.9                                       | -                                                                  | -                                                         | -                                           | 1.9                                  |
| 2<br>HST          | 0.25                                      | -                                                                  | -                                                         | 0.040                                       | 0.29                                 |
| 3<br>CST-WHC      | 1.9                                       | 0.000047                                                           | -                                                         | -                                           | 1.9                                  |
| 4<br>CST-EBC      | 1.6                                       | 0.0016                                                             | -                                                         | -                                           | 1.6                                  |
| 5<br>CST-GPP-CCUS | 0.93                                      | 0.00086                                                            | 0.053                                                     | -                                           | 0.99                                 |
| 6<br>CST-GPH-CCUS | 0.49                                      | 0.0014                                                             | 0.086                                                     | -                                           | 0.58                                 |
| 7<br>CST-GPP-CCU  | 0.70                                      | -                                                                  | 0.061                                                     | 0.047                                       | 0.80                                 |
| 8<br>CST-GPH-CCU  | 0.11                                      | -                                                                  | 0.098                                                     | 0.076                                       | 0.29                                 |



## S6 Efficiency of the use of energy for the reduction of CO<sub>2</sub> emissions in the scenarios

**Table S10:** Electricity consumed per CO<sub>2</sub> removed.

| Scenario          | GEI <sub>1</sub> = 0.25 t CO <sub>2</sub> emitted/MWh <sub>produced</sub><br>[MWh <sub>consumed</sub> /t CO <sub>2</sub> captured] | GEI <sub>2</sub> = 0.01 t CO <sub>2</sub> emitted/MWh <sub>produced</sub><br>[MWh <sub>consumed</sub> /t CO <sub>2</sub> captured] |
|-------------------|------------------------------------------------------------------------------------------------------------------------------------|------------------------------------------------------------------------------------------------------------------------------------|
| 2<br>HST          | 7.1                                                                                                                                | 2.7                                                                                                                                |
| 3<br>CST-WHC      | -                                                                                                                                  | -                                                                                                                                  |
| 4<br>CST-EBC      | 0.5                                                                                                                                | 0.4                                                                                                                                |
| 5<br>CST-GPP-CCUS | 1.3                                                                                                                                | 1.1                                                                                                                                |
| 6<br>CST-GPH-CCUS | 1.3                                                                                                                                | 1.0                                                                                                                                |
| 7<br>CST-GPP-CCU  | -                                                                                                                                  | 5.1                                                                                                                                |
| 8<br>CST-GPH-CCU  | -                                                                                                                                  | 5.5                                                                                                                                |

## S7 Methodology for mass and energy balances of the scenarios 1-CST, 2-HST and 8-CST-GPH-CCU.

### A. 1-CST

A reference integrated steel mill was selected from a study by the International Energy Agency (IEA)<sup>1</sup>. The mass and energy balances correspond to the production of 1 ton of liquid steel from the Basic Oxygen Furnace. Hence, the ladle metallurgy, continuous casting and rolling sections were not considered in this analysis. A detailed description of the steel mill's off gases is shown in Table 1. Part of the gases is used to generate heat in the steel production process and another part is sent to the power plant to generate 450 kWh/t l.s. of electricity, see Figure S10. The electricity required by the steel mill is 230 kWh/t l.s., indicating that the power plant produces more electricity than required by the steel plant.

### B. 2-HST

The mass and energy balances of a H<sub>2</sub>-based steel plant were performed with the information given in Table S4. All the data was collected from literature and the balances were performed as shown in Figure 11.

### C. 8-CST-GPH-CCU

The reference steel mill 1-CST is used as the base for the calculation of this scenario. All the steel mill gases were sent to the gas treatment plant and natural gas was used to generate the heat required in the steel plant; this calculation is shown in Figure S12. The mass balances and electricity requirements of the gas treatment plant were calculated with Aspen Plus, Matlab and data collected from literature as presented in Tables S2, S5 and S6. A summary of the calculations is displayed in Figures S12 and S13.

In the gas treatment plant, 90% of H<sub>2</sub> from COG was recovered via PSA and the CH<sub>4</sub>-rich stream was exported to a natural-gas-consuming plant, hence the CO<sub>2</sub> emitted by combusting this stream was avoided by the steel plant. In scenario 1-CST, this CH<sub>4</sub> is combusted in the power plant.

The BFG and BOFG were sent to a SEWGS process where additional steam was used to transform CO into H<sub>2</sub> and CO<sub>2</sub> while simultaneously separating the CO<sub>2</sub>-rich and H<sub>2</sub>-rich streams. The process was modeled in Aspen Plus to recover 95% of the CO<sub>2</sub> in the CO<sub>2</sub>-rich stream at 95% purity. The H<sub>2</sub>-rich stream contains most of the N<sub>2</sub>, which was then separated by a 2-stage H<sub>2</sub>/N<sub>2</sub> separation using polymeric membranes. The heat requirements of the SEWGS process were supplied by combustion of the N<sub>2</sub>-rich stream after membrane separation and by electric boilers.

The mass balance for the membrane separation was calculated considering the permeance of the gases, solving the equation systems with Matlab and implementing the resulting gas composition from each stage in the Aspen Plus model for the SEWGS process. In the membranes section, the gas was at 26 bar for the first separation stage, the outlet pressure was at 2 bar for 97% H<sub>2</sub> recovery and an area of 230 m<sup>2</sup>. For the second stage, the gas was recompressed to 9 bar before flowing through the second membrane with 210 m<sup>2</sup> of area, so 90% of the H<sub>2</sub> entering the separation section was recovered at 1 bar. The N<sub>2</sub>-rich gas contained 10% of the H<sub>2</sub> and was combusted to recover heat for the SEWGS process. The methanol plant was modelled in Aspen Plus to validate the data from literature. An overview of the methanol synthesis loop flowsheet is shown in Figure S14.

## 1-CST Steel plant

| Section                       | COG<br>[Nm <sup>3</sup> /t l.s.] | BFG<br>[Nm <sup>3</sup> /t l.s.] | BOFG<br>[Nm <sup>3</sup> /t l.s.] | Electricity<br>consumption<br>[kWh/t l.s.] | Steam<br>consumption<br>[kg/t l.s.] | CO <sub>2</sub><br>emissions<br>[t CO <sub>2</sub> /t l.s.] |
|-------------------------------|----------------------------------|----------------------------------|-----------------------------------|--------------------------------------------|-------------------------------------|-------------------------------------------------------------|
| Coke production               | 123                              | -170                             | 0                                 | 13                                         | 57                                  | 0.18                                                        |
| Sinter and pellets production | -4.3                             | 0                                | 0                                 | 33                                         | 0                                   | 0.30                                                        |
| Hot metal production          | -8.0                             | 1028                             | 0                                 | 95                                         | 7.3                                 | 0.41                                                        |
| Crude steel production        | 0                                | 0                                | 82                                | 20                                         | -71                                 | 0.047                                                       |
| Lime production               | -16                              | 0                                | 0                                 | 2.4                                        | 0                                   | 0.067                                                       |
| Oxygen production             | 0                                | 0                                | 0                                 | 62                                         | 6.8                                 | 0                                                           |
| <b>Total</b>                  | <b>95</b>                        | <b>858</b>                       | <b>82</b>                         | <b>226</b>                                 | <b>0.0</b>                          | <b>1.0</b>                                                  |
| Gases sent to the power plant |                                  |                                  |                                   |                                            |                                     |                                                             |

## Power plant

| Component                                 | From COG<br>[Nm <sup>3</sup> /t l.s.] | From BFG<br>[Nm <sup>3</sup> /t l.s.] | From BOFG<br>[Nm <sup>3</sup> /t l.s.] | Total<br>[Nm <sup>3</sup> /t l.s.] | LHV<br>[MJ/Nm <sup>3</sup> ] | [MJ/t l.s.] | CO <sub>2</sub><br>emissions<br>[t CO <sub>2</sub> /t l.s.] |
|-------------------------------------------|---------------------------------------|---------------------------------------|----------------------------------------|------------------------------------|------------------------------|-------------|-------------------------------------------------------------|
| CH <sub>4</sub>                           | 21.9                                  | 0                                     | 0                                      | 21.9                               | 36                           | 785         | 0.043                                                       |
| H <sub>2</sub>                            | 56.6                                  | 31.1                                  | 2.2                                    | 89.9                               | 11                           | 972         | 0                                                           |
| CO                                        | 3.7                                   | 191.6                                 | 46.6                                   | 241.8                              | 13                           | 3073        | 0.47                                                        |
| CO <sub>2</sub>                           | 0.9                                   | 189.6                                 | 11.8                                   | 202.3                              | 0                            | 0           | 0.40                                                        |
| Other HC (C <sub>x</sub> H <sub>y</sub> ) | 2.6                                   | 0                                     | 0                                      | 2.6                                | 63                           | 162         | 0.010                                                       |
| <b>Total</b>                              |                                       |                                       |                                        |                                    |                              | <b>4992</b> | <b>0.92</b>                                                 |

Considering 32.1% efficiency in the power plant:

Electricity produced:

1603 MJ/t l.s.

Electricity produced:

445 kWh/t l.s.

Carbon intensity of the electricity:

2.1 t CO<sub>2</sub>/MWh

## Summary

| Section      | Electricity consumption<br>[MWh/t l.s.] | Non-related to electricity<br>CO <sub>2</sub> emissions<br>[t CO <sub>2</sub> /t l.s.] |
|--------------|-----------------------------------------|----------------------------------------------------------------------------------------|
| Steel plant  | 226                                     | 1.0                                                                                    |
| Power plant  | -445                                    | 0.92                                                                                   |
| <b>Total</b> | <b>-220</b>                             | <b>1.9</b>                                                                             |

Figure S10. Methodology for mass and energy balances of the scenario 1-CST.

## 2-HST Steel plant

|                                                                                      |            |                                    |   |      |
|--------------------------------------------------------------------------------------|------------|------------------------------------|---|------|
| Energy consumption for Direct Reduction with 100% H <sub>2</sub> in ENERGIRON plants | 8.2        | GJ H <sub>2</sub> /t DRI           | 8 | Ref. |
| Lower Heating Value H <sub>2</sub>                                                   | 0.011      | GJ H <sub>2</sub> /Nm <sup>3</sup> |   |      |
| Metallization                                                                        | 94         | %                                  | 7 |      |
| t DRI/t l.s. ratio based in metallization                                            | 1.1        | t DRI/t l.s.                       |   |      |
| Electricity for H <sub>2</sub> production in electrolyzers                           | 4.5        | kWh/Nm <sup>3</sup>                | 9 |      |
| <b>Electricity required for H<sub>2</sub> production</b>                             | <b>3.6</b> | <b>MWh/t l.s.</b>                  |   |      |

$$\frac{8.2 \text{ GJ H}_2}{\text{t DRI}} \cdot \frac{\text{Nm}^3 \text{ H}_2}{0.011 \text{ GJ H}_2} \cdot \frac{\text{t DRI}}{0.94 \text{ t l.s.}} \cdot \frac{4.5 \text{ kWh}}{\text{Nm}^3 \text{ H}_2} \cdot \frac{\text{MWh}}{1000 \text{ kWh}} = 3.6 \frac{\text{MWh}}{\text{t l.s.}}$$

| Section                                   | Electricity consumption [MWh/t l.s.] | Non-related to electricity CO <sub>2</sub> emissions [t CO <sub>2</sub> /t l.s.] | Ref. |
|-------------------------------------------|--------------------------------------|----------------------------------------------------------------------------------|------|
| Pellet production                         | -                                    | 0.13                                                                             | 4    |
| Lime production                           | 0.002                                | 0.056                                                                            | 1    |
| Electricity for H <sub>2</sub> production | 3.6                                  | Depends on GEI                                                                   |      |
| Carbon addition in EAF                    | -                                    | 0.05                                                                             | 6    |
| Electricity for EAF                       | 0.63                                 | Depends on GEI                                                                   | 7    |
| Decomposition electrodes in EAF           | -                                    | 0.007                                                                            | 10   |
| <b>Total</b>                              | <b>4.2</b>                           | <b>0.24</b>                                                                      |      |

|                                                        |      |                           |
|--------------------------------------------------------|------|---------------------------|
| Total emissions when GEI = 0.25 t CO <sub>2</sub> /MWh | 1.3  | t CO <sub>2</sub> /t l.s. |
| Total emissions when GEI = 0.01 t CO <sub>2</sub> /MWh | 0.29 | t CO <sub>2</sub> /t l.s. |

Figure S11. Methodology for mass and energy balances of the scenario 2-HST.

## 8-CST-GPH-CCU Steel, gas treatment and methanol plants.

### Steel plant:

| Section                           | COG [Nm <sup>3</sup> /t l.s.] | BFG [Nm <sup>3</sup> /t l.s.] | BOFG [Nm <sup>3</sup> /t l.s.] | Electricity consumption [kWh/t l.s.] | Natural gas consumption [MJ/t l.s.] | Steam consumption [kg/t l.s.] | CO <sub>2</sub> emissions [t CO <sub>2</sub> /t l.s.] |
|-----------------------------------|-------------------------------|-------------------------------|--------------------------------|--------------------------------------|-------------------------------------|-------------------------------|-------------------------------------------------------|
| Coke production                   | 166                           | 0                             | 0                              | 13.2                                 | 1280.2                              | 56.5                          | 0.077                                                 |
| Sinter and pellets production     | 0                             | 0                             | 0                              | 32.9                                 | 74.5                                | 0                             | 0.30                                                  |
| Hot metal production              | 0                             | 1467                          | 0                              | 95.2                                 | 1545.5                              | 7.3                           | 0.11                                                  |
| Crude steel production            | 0                             | 0                             | 81.8                           | 20.0                                 | 0                                   | -70.6                         | 0.046                                                 |
| Lime production                   | 0                             | 0                             | 0                              | 2.4                                  | 277.3                               | 0                             | 0.072                                                 |
| Oxygen production                 | 0                             | 0                             | 0                              | 61.8                                 | 0                                   | 6.8                           | 0                                                     |
| <b>Total</b>                      | <b>166</b>                    | <b>1467</b>                   | <b>82</b>                      | <b>226</b>                           | <b>3178</b>                         | <b>0.0</b>                    | <b>0.60</b>                                           |
| Gases sent to gas treatment plant |                               |                               |                                | 78 Nm <sup>3</sup> NG/t l.s.         |                                     |                               |                                                       |

### Gas treatment plant - PSA (literature and Aspen Plus)

| Component                                 | COG in [Nm <sup>3</sup> /t l.s.] | COG in [kmol/t l.s.] | H <sub>2</sub> rich gas [kmol/t l.s.] | PSA off-gas [kmol/t l.s.] | LHV [MJ/Nm <sup>3</sup> ] | [MJ/t l.s.] |                       |
|-------------------------------------------|----------------------------------|----------------------|---------------------------------------|---------------------------|---------------------------|-------------|-----------------------|
| CH <sub>4</sub>                           | 38                               | 1.7                  | 0.0                                   | 1.7                       | 36                        | 1369        |                       |
| H <sub>2</sub>                            | 99                               | 4.4                  | 4.0                                   | 0.44                      | 11                        | 107         |                       |
| CO                                        | 6.4                              | 0.28                 | 0.0                                   | 0.28                      | 13                        | 81          |                       |
| CO <sub>2</sub>                           | 1.6                              | 0.071                | 0.0                                   | 0.07                      | 0                         | 0           |                       |
| N <sub>2</sub>                            | 9.6                              | 0.43                 | 0.0                                   | 0.43                      | 0                         | 0           |                       |
| O <sub>2</sub>                            | 0.32                             | 0.014                | 0.0                                   | 0.014                     | 0                         | 0           |                       |
| H <sub>2</sub> O                          | 6.6                              | 0.29                 | 0.0                                   | 0.29                      | 0                         | 0           |                       |
| Other HC (C <sub>x</sub> H <sub>y</sub> ) | 4.5                              | 0.20                 | 0.0                                   | 0.20                      | 63                        | 282         |                       |
|                                           |                                  |                      | to methanol plant                     |                           | <b>Total [MJ/t l.s.]</b>  | 1838        | 24 MJ/Nm <sup>3</sup> |

Exported to a natural gas consuming plant.

|                                               |               |
|-----------------------------------------------|---------------|
| Electricity required (from Aspen Plus model): | 27 kWh/t l.s. |
|-----------------------------------------------|---------------|

Figure S12. Methodology for mass and energy balances of the scenario 8-CST-GPH-CCU (part A).

### Gas treatment plant - SEWGS (Aspen Plus)

| Component       | BFG+BOFG in (dry basis) [Nm <sup>3</sup> /t l.s.] | BFG+BOFG in (dry basis) [kmol/t l.s.] | After SEWGS (dry basis) CO <sub>2</sub> rich gas [kmol/t l.s.] | After SEWGS (dry basis) H <sub>2</sub> rich gas [kmol/t l.s.] |
|-----------------|---------------------------------------------------|---------------------------------------|----------------------------------------------------------------|---------------------------------------------------------------|
| H <sub>2</sub>  | 55                                                | 2.5                                   | 0.59                                                           | 18                                                            |
| CO              | 373                                               | 17                                    | 0.013                                                          | 0.39                                                          |
| CO <sub>2</sub> | 334                                               | 15                                    | 30                                                             | 1.6                                                           |
| N <sub>2</sub>  | 723                                               | 32                                    | 1.0                                                            | 31                                                            |
|                 |                                                   |                                       | to methanol plant                                              | to H <sub>2</sub> /N <sub>2</sub> separation                  |

### Gas treatment plant - H<sub>2</sub>/N<sub>2</sub> separation (Matlab)

| Component       | After SEWGS in (dry basis) [kmol/t l.s.] | H <sub>2</sub> rich gas out of 1st membrane (dry basis) [kmol/t l.s.] | H <sub>2</sub> rich gas out of 2nd membrane (dry basis) [kmol/t l.s.] | H <sub>2</sub> lean gas out of H <sub>2</sub> /N <sub>2</sub> separation (dry basis) [kmol/t l.s.] |
|-----------------|------------------------------------------|-----------------------------------------------------------------------|-----------------------------------------------------------------------|----------------------------------------------------------------------------------------------------|
| H <sub>2</sub>  | 18                                       | 18                                                                    | 16                                                                    | 1.8                                                                                                |
| CO              | 0.39                                     | 0.012                                                                 | 0.003                                                                 | 0.39                                                                                               |
| CO <sub>2</sub> | 1.6                                      | 0.52                                                                  | 0.16                                                                  | 1.4                                                                                                |
| N <sub>2</sub>  | 31                                       | 0.54                                                                  | 0.008                                                                 | 31                                                                                                 |
|                 |                                          | to 2nd membrane                                                       | to methanol plant                                                     | Burned for energy recovery                                                                         |

0.08 t CO<sub>2</sub>/t l.s.  
Emissions

### Methanol plant (literature and Aspen Plus)

| Component       | H <sub>2</sub> rich gas from PSA (dry basis) [kmol/t l.s.] | CO <sub>2</sub> rich gas from SEWGS (dry basis) [kmol/t l.s.] | H <sub>2</sub> rich gas from H <sub>2</sub> /N <sub>2</sub> separation (dry basis) [kmol/t l.s.] | H <sub>2</sub> from electrolyzer[kmol/t l.s.] |
|-----------------|------------------------------------------------------------|---------------------------------------------------------------|--------------------------------------------------------------------------------------------------|-----------------------------------------------|
| H <sub>2</sub>  | 4.0                                                        | 0.59                                                          | 16                                                                                               | 68                                            |
| CO              | 0.0                                                        | 0.013                                                         | 0.003                                                                                            | 0.0                                           |
| CO <sub>2</sub> | 0.0                                                        | 30                                                            | 0.16                                                                                             | 0.0                                           |
| N <sub>2</sub>  | 0.0                                                        | 1.0                                                           | 0.008                                                                                            | 0.0                                           |

|                                     |                               |
|-------------------------------------|-------------------------------|
| <b>Methanol produced</b>            | <b>0.96 t methanol/t l.s.</b> |
| Electricity for methanol production | 1.5 MWh/t methanol            |
| <b>Electricity required</b>         | <b>1.4 MWh/t l.s.</b>         |

Replacement of conventional methanol:  
Electricity credit -0.16 kWh/t l.s.  
CO<sub>2</sub> credit -0.50 t CO<sub>2</sub>/t l.s.

### Electrolyzer

|                                 |                              |
|---------------------------------|------------------------------|
| H <sub>2</sub> required         | 1534 Nm <sup>3</sup> /t l.s. |
| Electricity in the electrolyzer | 4.5 kWh/Nm <sup>3</sup>      |
| <b>Electricity required</b>     | <b>6.9 MWh/t l.s.</b>        |

### Summary

| Section                                           | Electricity consumption [MWh/t l.s.] | Non-related to electricity CO <sub>2</sub> emissions [t CO <sub>2</sub> /t l.s.] |                                                                                                  |
|---------------------------------------------------|--------------------------------------|----------------------------------------------------------------------------------|--------------------------------------------------------------------------------------------------|
| Steel plant                                       | 0.23                                 | 0.61                                                                             | <b>Total emissions when:<br/>GEI = 0.25 t CO<sub>2</sub>/MWh<br/>2.4 t CO<sub>2</sub>/t l.s.</b> |
| PSA                                               | 0.027                                | 0                                                                                |                                                                                                  |
| SEWGS + H <sub>2</sub> /N <sub>2</sub> separation | 0.46                                 | 0.079                                                                            |                                                                                                  |
| Methanol plant                                    | 1.4                                  | 0                                                                                |                                                                                                  |
| Electrolyzer                                      | 6.9                                  | 0                                                                                | <b>GEI = 0.01 t CO<sub>2</sub>/MWh<br/>0.29 t CO<sub>2</sub>/t l.s.</b>                          |
| Replacement of conventional methanol synthesis    | -0.16                                | -0.50                                                                            |                                                                                                  |
| <b>Total</b>                                      | <b>8.9</b>                           | <b>0.19</b>                                                                      |                                                                                                  |

Figure S13. Methodology for mass and energy balances of the scenario 8-CST-GPH-CCU (part B).

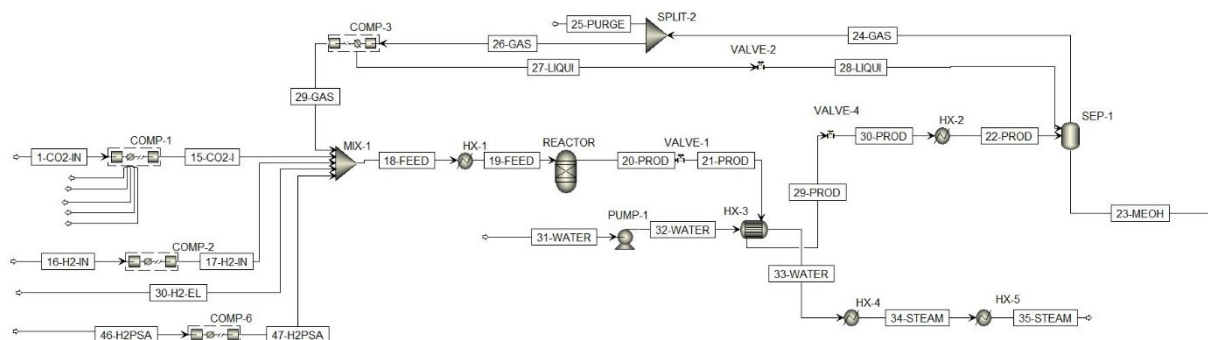

**Figure S14.** Methanol synthesis loop section of the Aspen Plus validation model.

## S8 Selected values and sensitivity analysis of key process variables.

**Table S11.** Key process variables and selected values

| Variable                                                          | Selected Value                                              | Range                                                                             | Source                                                                |
|-------------------------------------------------------------------|-------------------------------------------------------------|-----------------------------------------------------------------------------------|-----------------------------------------------------------------------|
| Power plant efficiency                                            | 32.1%                                                       | -                                                                                 | Based on literature <sup>1</sup> .                                    |
| H <sub>2</sub> required in the H <sub>2</sub> -based steel-making | 8.2 GJ H <sub>2</sub> /t DRI                                | -                                                                                 | Based on literature <sup>6</sup> .                                    |
| DRI metallization                                                 | 94%                                                         | 94-96%                                                                            | Based on literature <sup>7</sup> .                                    |
| Power in electrolyzer                                             | 4.5 kWh/Nm <sup>3</sup>                                     | 3.2 – 6.1 kWh/Nm <sup>3</sup>                                                     | Based on literature <sup>6, 9</sup> .                                 |
| Power in EAF                                                      | 630 kWh/t l.s.                                              | Cold DRI: ~670 kWh/t l.s.<br>Hot DRI: ~580 kWh/t l.s.                             | Based on literature <sup>7</sup> .                                    |
| H <sub>2</sub> recovery after PSA                                 | 90%                                                         | 70-90%                                                                            | Based on literature <sup>11</sup> and PSA provider.                   |
| SEWGS                                                             | CO <sub>2</sub> capture: 95%<br>CO <sub>2</sub> purity: 95% | Latest campaign:<br>CO <sub>2</sub> capture > 90%<br>CO <sub>2</sub> purity > 90% | Based on their latest campaign <sup>14</sup> .                        |
| Methanol synthesis                                                | 100% gas conversion                                         | Reached 100% with the lowest purge.                                               | Based on literature <sup>5</sup> and confirmed with Aspen Plus model. |

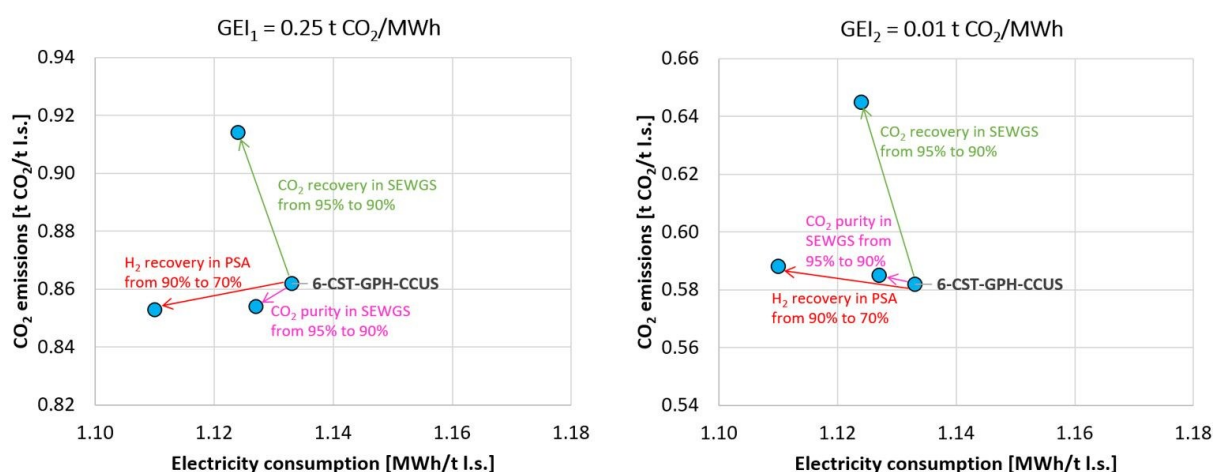

**Figure S15.** Sensitivity analysis for 3 key performance parameters for CCUS scenario 6 using electricity from a mixed and a renewable grid.



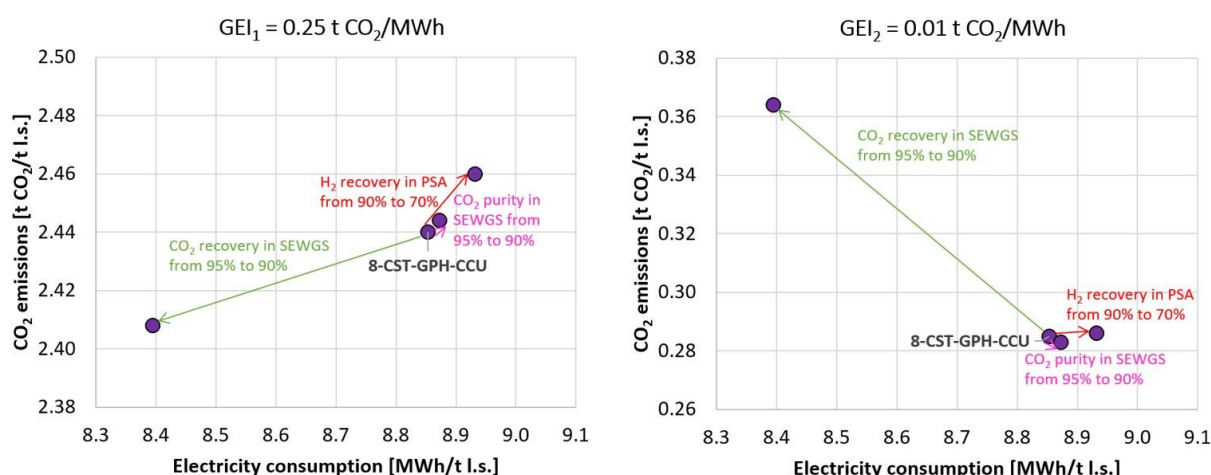

**Figure S16.** Sensitivity analysis for 3 key process performance parameters for CCU scenario 8 using electricity from a mixed and a renewable grid.

## References

1. *Iron and Steel CCS Study (Techno-Economics Integrated Steel Mill)*, IEA, 2013.
2. M. Sprecher, H. Bodo Längen, B. Stranzinger, H. Rosemann and W. Adler, *Abwärmenutzungspotenziale in Anlagen integrierter Hüttenwerke der Stahlindustrie*, Stahlinstitut VDEh, 2019.
3. M. Dreillard, P. Broutin, P. Briot, T. Huard and A. Lettat, *Energy Procedia*, 2017, **114**, 2573-2589.
4. A. Volpatti, presented in part at the World DRI & Pellet Congress, Abu Dhabi, 2013.
5. *Low carbon energy and feedstock for the European chemical industry*, DECHEMA, 2017.
6. P. Duarte, *Hydrogen-based steelmaking*, Tenova HYL, 2018.
7. A. Hertrich, presented in part at the 7th World DRI & Pellet Congress, Dubai, 2019.
8. P. Argenta, M. Marozzi, M. Dorndorf, P. Duarte, S. Maggiolino and O. Demir, *Conventional Steelmaking Route Being Subject to Transformation*, Tenova.
9. P. Häussinger, R. Lohmüller and A. M. Watson, in *Ullmann's Encyclopedia of Industrial Chemistry*, Wiley-VCH, Weinheim, 2011, vol. 18, pp. 249-307.
10. A. Babich and D. Senk, in *The Coal Handbook: Towards Cleaner Production*, ed. D. Osborne, Woodhead Publishing, 2013, vol. 2, pp. 267-311.
11. *US Pat.*, US20180036671A1, 2018.
12. H. A. J. van Dijk, P. D. Cobden, L. Lukashuk, L. v. de Water, M. Lundqvist, G. Manzolini, C.-C. Cormos, C. van Dijk, L. Mancuso, J. Johns and D. Bellqvist, *Johnson Matthey Technology Review*, 2018, **62**, 395-402.
13. W. L. McCabe and J. C. Harriot, *Unit Operations in Chemical Engineering*, McGraw-Hill, New York, 5th edition edn., 1993.
14. STEPWISE, How - Main Achievements, <https://www.stepwise.eu/project/how/>, (accessed April, 2020).
